RESEARCH ARTICLE

# Prevalence, distribution, and associated factors of suicide attempts in young adolescents: School-based data from 40 low-income and middle-income countries

Xiang Liu<sup>1</sup>, Yi Huang<sup>2</sup>, Yuanyuan Liu<sup>3\*</sup>

**1** Department of Health and Social Behavior, School of Public Health, Sichuan University, Chengdu, Sichuan Province, China, **2** Mental Health Center, West China Hospital, Sichuan University, Chengdu, Sichuan Province, China, **3** Department of Epidemiology and Health Statistics, School of Public Health, Sichuan University, Chengdu, Sichuan Province, China

\* [y\\_multi@126.com](mailto:y_multi@126.com)

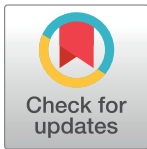

**OPEN ACCESS**

**Citation:** Liu X, Huang Y, Liu Y (2018) Prevalence, distribution, and associated factors of suicide attempts in young adolescents: School-based data from 40 low-income and middle-income countries. PLoS ONE 13(12): e0207823. <https://doi.org/10.1371/journal.pone.0207823>

**Editor:** Kenji Hashimoto, Chiba Daigaku, JAPAN

**Received:** June 19, 2018

**Accepted:** November 5, 2018

**Published:** December 19, 2018

**Copyright:** © 2018 Liu et al. This is an open access article distributed under the terms of the [Creative Commons Attribution License](https://creativecommons.org/licenses/by/4.0/), which permits unrestricted use, distribution, and reproduction in any medium, provided the original author and source are credited.

**Data Availability Statement:** Data are available from the Global School-Based Student Health Survey (GSHS), <https://www.cdc.gov/gshs/>. Data may be located by navigating to “Data and Documentation” in the “Latest Results” and then sorting by country.

**Funding:** This study was partly supported by Natural Science Foundation of China (Grant No. 81371495).

**Competing interests:** The authors have declared that no competing interests exist.

## Abstract

Suicide attempts are the most important known predictor of death by suicide. The aim of this study is to examine the prevalence, distribution, and associated factors of suicide attempts among young adolescents in 40 low-income and middle-income countries. We used data from the Global School-Based Student Health Survey (2009–2013) and a nationally representative study in China (2010), which are school-based surveys of students primarily aged 12–18 years that assess health behaviors using an anonymous, standardized, self-reported questionnaire. We calculated the prevalence of suicide attempts in young adolescents from 40 low-income and middle-income countries using the surveys. Multilevel logistic models were used to estimate the associations between suicide attempts and potential risk factors, adjusting for gender, age, school and survey year. Results show that the mean 12-month prevalence of suicide attempts was 17.2%, ranging from 6.7% in Malaysia to 61.2% in Samoa. The overall prevalence of suicide attempts was higher for girls than for boys (18.2% vs 16.2%,  $P < 0.05$ ). Among the suicide attempts, the proportion of suicide attempts with a plan was higher for girls than for boys (62.7% vs 53.2%,  $P < 0.05$ ). Both the prevalence of suicide attempts and the proportion of suicide attempts with a plan increased with age. Factors associated with suicide attempts included poor socioeconomic status, history of bullying, loneliness and anxiety, tobacco and alcohol use, and weak family and social relationships. In conclusion, suicide attempts are frequent among young adolescents in low-income and middle-income countries. Girls and older adolescents tend to make suicide attempts with a plan. The data demonstrate the need to strengthen suicide intervention and prevention programs for young adolescents in low-income and middle-income countries.

## Introduction

Suicide is a serious public health problem that affects children and adolescents[1]. The World Health Organization (WHO) indicated that suicide is the second leading cause of death for

youths between the ages of 15 and 29[2], particularly girls 15–19 years old, for whom suicide is the leading cause[3]. For each completed suicide, it is estimated that 100–200 adolescents make a suicide attempt[4]. More importantly, a prior suicide attempt is the most important known risk factor for death by suicide[5,6]. Individuals who have previously attempted suicide are at a much higher risk of dying by suicide compared with those who have never attempted suicide[7,8]. Additionally, some studies have suggested that suicide attempts predict various problems, including physical health problems, mental disorders, interpersonal difficulties, harming others and greater treatment service utilization[9–11].

Suicide attempts often emerge in adolescents and are prevalent among this age group. The prevalence of suicide attempts in adolescent varies widely by region, age, gender, ethnicity and other factors. Across 17 European countries, the lifetime prevalence of suicide attempts among students aged 15–16 years varied from 4.1% to 23.5%[12]. The 2013 Youth Risk Behavior Survey of students in the United States demonstrated that 5.4% of boys and 10.6% of girls had attempted suicide[13]. While most of the data come from Europe and North America, these developed countries generally have sophisticated youth risk behavior surveillance systems that can monitor youth risk behaviors, including suicide attempts. Compared with developed countries, studies on the prevalence and determinants of adolescent suicide attempts in low- and middle-income countries (LMICs) are limited, as available data on suicidal behaviors are often lacking in LMICs. In reality, LMICs bear most of the global suicide burden, with an estimated 75% of all suicides occurring in these countries[2], as the majority of the world's population live in LMICs. A growing number of studies assessing adolescent suicide attempts have been conducted in several LMICs, including China, Mexico, and Ghana[14–16]. Although studies from individual countries have expanded knowledge in regard to adolescent suicide attempts in LMICs, inconsistencies in the definition of a suicide attempt, data collection methods and measured recall time-points make it difficult to compare the prevalence and risk factors of adolescent suicide attempts across different countries.

The Global School-Based Student Health Survey (GSHS) is a collaborative surveillance project designed to assess adolescent health risk behaviors and exposure, supported by the WHO[17]. GSHS data have been applied to study the prevalence of adolescent suicide attempts and related risk factors in individual LMICs and Western Pacific Island countries[16,18–20]. Notably, two cross-national studies explored adolescent suicidal behaviors among all the low- and middle-income countries using the GSHS completed between 2003 and 2012[21,22]. However, both studies compiled only the prevalence of suicidal ideation without suicide attempts among adolescents. In 2009, a question about suicide attempts was added to the GSHS for most countries. It is essential to monitor the distribution of suicide attempts in young adolescents to provide important information for the development of suicide prevention strategies. In this study, we estimate the prevalence of suicide attempts among young adolescents and examine the factors associated with suicide attempts in 40 LMICs.

## Methods

### Data sources

We used data on suicide attempts from the GSHS completed between 2009 and 2013 for all countries. This survey was developed by the WHO in collaboration with UNICEF, UNESCO, and UNAIDS, with technical assistance from US Centers for Disease Control and Prevention (CDC). The GSHS used a standardized sample selection process, a two-stage random cluster sampling of schools and classes to select eligible participants mainly aged 12–18 years old from each country[23]. All GSHS versions were approved by institutional review boards or ethics

committees and the Ministry of Health or Education of each country. Written or verbal consent was also obtained from the students and their parents.

We included countries for which survey data on suicide attempts and potential risk factors were available. Countries with missing reports of these items were not selected. Finally, we included 39 countries from five WHO regions (Africa, the Americas, Eastern Mediterranean, Asia and Western Pacific). The survey dates ranged from 2009, the first year that the suicide attempt query was added to the questionnaire, to 2013, the latest year with publicly available data at the time of this study. [Table 1](#) shows the characteristics of the included surveys from the GSHS.

## Measures

The GSHS consists of several questionnaire modules that address the leading causes of morbidity and mortality among children worldwide, including tobacco use, alcohol and drug use, violence and unintentional injuries, mental health and sexual behaviors[23]. There are no published studies demonstrating the validity or reliability of the GSHS. However, many items included on the GSHS adopted from other youth risk behavior surveillance systems such as the YRBS, the GYTS and the Health Behavior in School-aged Children (HBSC) survey. Further, there is evidence that reporting health risk behaviors in students show good reliability [25].

In the GSHS, suicide attempts were assessed with the question: “During the past 12 months, how many times did you actually attempt suicide?”. Suicide attempts were defined as at least 1 attempt in the past 12 months. To quantify the type of suicide attempt (suicide attempt with a plan and without a plan), the suicidal plan was assessed with the question “During the past 12 months, did you make a plan for how you would attempt suicide?”.

We selected the potential risk factors for suicide attempts on the basis of previous research. The determinants included substance use (cigarette smoking and alcohol use), bullying victimization, physical activity, mental condition (anxiety and loneliness) and social support (close friends and parental support). Given that the socioeconomic status of the young adolescents was not included in the GSHS, we assessed a proxy variable based on the frequency of going hungry. The relevant questions for the variables and coding are indicated in [Table 2](#).

We used the GDP per capita for each country corresponding to the survey year as reported by the World Bank for most countries and reported by the Index Mundi for the few countries for which GDP per capita was not listed in the World Bank list.

## Statistical analysis

All data were weighted based on a random cluster sampling design to provide nationally representative estimates for each country. We used the Complex Samples module in SPSS version 21.0 to estimate the weighted prevalence (with corresponding 95% CIs) by country and gender. As significant heterogeneity was noted between countries ( $I^2 > 95\%$ ), a random effects meta-analysis model was applied for the following analyses: (1) to estimate the regional and total prevalence of suicide attempts; (2) to test the differences in the prevalence of suicide attempts between genders and age groups; and (3) to test the differences in the proportion of suicide attempt type between genders and age groups. According to the random cluster sampling, multilevel logistic regression models based on three levels (country, school and individual level) were employed to estimate the associations between the determinants and suicide attempts. We initially fit an empty model with no explanatory variables (model 1) that was used to estimate the intra-class correlation coefficient (ICC) [26]. The ICC is interpreted as the proportion of the total variance that can be attributed to the higher level in the analysis.

**Table 1. Survey characteristics of the GSHS according to country, 2009–2013.**

| Country                                    | Survey year | Sample size | Response rate (%) | Boys (%) |
|--------------------------------------------|-------------|-------------|-------------------|----------|
| <b>Africa (6 countries)</b>                |             |             |                   |          |
| Benin                                      | 2009        | 2649        | 99.7              | 65.0     |
| Ghana                                      | 2012        | 3543        | 99.0              | 53.8     |
| Malawi                                     | 2009        | 2212        | 99.1              | 46.9     |
| Mauritania                                 | 2010        | 1976        | 98.0              | 47.1     |
| Namibia                                    | 2013        | 4410        | 98.5              | 47.2     |
| Swaziland                                  | 2013        | 3612        | 97.4              | 47.5     |
| <b>Americas (17 countries)</b>             |             |             |                   |          |
| Antigua and Barbuda                        | 2009        | 1216        | 98.8              | 46.6     |
| Argentina                                  | 2012        | 27778       | 98.4              | 47.7     |
| Bahamas                                    | 2013        | 1340        | 97.9              | 46.4     |
| Belize                                     | 2011        | 1968        | 98.7              | 47.5     |
| Bolivia                                    | 2012        | 3438        | 98.5              | 50.6     |
| British Virgin Islands                     | 2009        | 1584        | 99.1              | 44.9     |
| Costa Rica                                 | 2009        | 2653        | 99.5              | 48.3     |
| Dominica                                   | 2009        | 1599        | 99.1              | 43.7     |
| Guatemala                                  | 2009        | 5419        | 99.2              | 45.5     |
| Honduras                                   | 2012        | 1715        | 99.5              | 48.2     |
| Jamaica                                    | 2010        | 1570        | 99.2              | 48.9     |
| Peru                                       | 2010        | 2842        | 99.0              | 48.8     |
| Saint Kitts and Nevis                      | 2011        | 1714        | 98.8              | 44.0     |
| Salvador                                   | 2013        | 1858        | 99.5              | 53.8     |
| Suriname                                   | 2009        | 1673        | 98.9              | 51.1     |
| Trinidad and Tobago                        | 2011        | 2621        | 98.9              | 54.5     |
| Uruguay                                    | 2012        | 3455        | 99.4              | 46.4     |
| <b>Eastern Mediterranean (6 countries)</b> |             |             |                   |          |
| Iraq                                       | 2012        | 1980        | 98.9              | 56.4     |
| Kuwait                                     | 2011        | 2650        | 98.9              | 50.3     |
| Lebanon                                    | 2011        | 2248        | 99.6              | 46.7     |
| Morocco                                    | 2010        | 2830        | 97.7              | 52.5     |
| Palestine                                  | 2010        | 4441        | 97.3              | 47.3     |
| United Arab Emirates                       | 2010        | 2551        | 99.1              | 42.0     |
| <b>Asia (5 countries)</b>                  |             |             |                   |          |
| Cambodia                                   | 2013        | 3783        | 99.6              | 47.2     |
| Malaysia                                   | 2011        | 25421       | 99.9              | 50.0     |
| Mongolia                                   | 2013        | 5301        | 99.3              | 46.8     |
| Philippines                                | 2011        | 5212        | 99.8              | 43.2     |
| China*                                     | 2010        | 8820        | -                 | 50.5     |
| <b>Western Pacific (6 countries)</b>       |             |             |                   |          |
| Kiribati                                   | 2011        | 1555        | 98.6              | 43.5     |
| Niue                                       | 2010        | 134         | 100.0             | 59.7     |
| Samoa                                      | 2011        | 2303        | 93.7              | 41.2     |
| Solomon Islands                            | 2011        | 1293        | 97.1              | 52.0     |
| Tuvalu                                     | 2013        | 899         | 98.3              | 48.5     |

(Continued)

Table 1. (Continued)

| Country | Survey year | Sample size | Response rate (%) | Boys (%) |
|---------|-------------|-------------|-------------------|----------|
| Vanuatu | 2011        | 1014        | 100.0             | 44.2     |

\* China is one of the important countries in Asia, and it has large number of young adolescents, so we included China in our study. Because GSHS data in China were collected in 2003, we used data from a large sample size study performed in 2010 in China[24]. This research is part of a program for youth health risk behavior assessments in China, which was supported by China’s Ministry of Science and Technology. The research was a school-based survey of suicidal behaviors among students mainly aged 12–18 years. The selection of eligible students and the questions used to assess suicidal behaviors were similar between this study and the GSHS.

<https://doi.org/10.1371/journal.pone.0207823.t001>

Therefore, the ICC indicated the degree to which suicide attempts clustered within countries and schools. Subsequently, we introduced all potential explanatory variables in the model after adjusting for age, gender, school, country and survey year (model 2). A two-sided *P* value of less than 0.05 was considered statistically significant.

## Results

We included the data from 146460 young adolescents (48.4% boys) aged 12–18 years from the GSHS and 8820 Chinese young adolescents (50.5% boys) aged mainly 12–18 years from a nationally representative study. The median sample size per country (for the GSHS data) was 2303.

Table 2. GSHS questions used in the analysis of adolescent suicide attempts.

| Variable          | Question                                                                                                         | Values                                                            |
|-------------------|------------------------------------------------------------------------------------------------------------------|-------------------------------------------------------------------|
| Suicide attempt   | During the past 12 months, how many times did you actually attempt suicide?                                      | 0 = No<br>1 = Yes                                                 |
| Suicide planning  | During the past 12 months, did you make a plan for how you would attempt suicide?                                | 0 = No<br>1 = Yes                                                 |
| Lack of food      | During the past 30 days, how often did you go hungry because there was not enough food in your home?             | 1 = Never/Rarely/<br>Sometimes<br>2 = Most of the time/<br>Always |
| Bullying          | During the past 30 days, on how many days were you bullied?                                                      | 1 = No (0 days)<br>2 = Yes (1 or more days)                       |
| Loneliness        | During the past 12 months, how often have you felt lonely?                                                       | 1 = Never/Rarely/<br>Sometimes<br>2 = Most of the time/<br>Always |
| Anxiety           | During the past 12 months, how often have you been so worried about something that you could not sleep at night? | 1 = Never/Rarely/<br>Sometimes<br>2 = Most of the time/<br>Always |
| Parental support  | During the past 30 days, how often did your parents or guardians understand your problems and worries?           | 1 = Never/Rarely/<br>Sometimes<br>2 = Most of the time/<br>Always |
| Close friends     | How many close friends do you have?                                                                              | 1 = No (none)<br>2 = Yes (1 or more)                              |
| Alcohol use       | During the past 30 days, on how many days did you have at least one drink containing alcohol?                    | 1 = No (0 days)<br>2 = Yes (1 or more days)                       |
| Cigarette smoking | During the past 30 days, on how many days did you smoke cigarettes?                                              | 1 = No (0 days)<br>2 = Yes (1 or more days)                       |

<https://doi.org/10.1371/journal.pone.0207823.t002>

**Table 3. Prevalence of suicide attempts in young adolescents by region and gender.**

| Region                | Boys              | Girls               | Total             |
|-----------------------|-------------------|---------------------|-------------------|
| Africa                | 20.6% (15.3–25.9) | 20.7% (15.7–25.7)   | 20.6% (15.5–25.7) |
| Americas              | 11.7% (10.2–13.2) | 16.8% (14.8–18.7) * | 14.3% (12.7–15.9) |
| Eastern Mediterranean | 15.4% (12.2–18.5) | 16.7% (14.1–19.3)   | 16.0% (13.2–18.7) |
| Asia                  | 7.8% (5.6–10.0)   | 9.8% (6.2–13.4)*    | 8.9% (5.9–11.9)   |
| Western Pacific       | 31.2% (12.6–49.9) | 26.8% (4.2–49.4)*   | 28.6% (10.0–47.3) |
| Total                 | 16.2% (13.7–18.7) | 18.2% (15.5–20.9) * | 17.2% (14.7–19.7) |

\* $P < 0.05$  for the difference between genders.

<https://doi.org/10.1371/journal.pone.0207823.t003>

Table 3 shows the 12-month prevalence of suicide attempts among young adolescents by WHO region and gender. In total, 17.2% of the assessed young adolescents reported having made a suicide attempt in the past year. The prevalence of suicide attempts was highest in the Western Pacific region (28.6%) and lowest in the Asian region (8.9%). The overall prevalence of suicide attempts was higher for girls than for boys (18.2% vs 16.2%,  $P < 0.05$ ). However, the gender difference was not consistent across different regions. The prevalence of suicide attempts was higher in girls in the Americas and Asian regions, while it was higher in boys in the Western Pacific region ( $P < 0.05$ , Table 3).

The prevalence of suicide attempts ranged from 6.7% in Malaysia to 61.2% in Samoa. Of the 40 countries, 33 (82.5%) countries exceeded a 10% suicide attempt prevalence rate (S1 Table).

Table 4 shows the prevalence of suicide attempts and the proportion of suicide attempt type by gender and age. Among the suicide attempts, girls were more likely to report suicide attempts with a plan than were boys (62.7% vs 53.2%,  $P < 0.05$ ). Across age groups, adolescents aged 16 years or older tended to make suicide attempts more than adolescents aged 12–13 years in most countries ( $P < 0.05$ , S2 Table). The overall prevalence of suicide attempts was highest for those aged 16 years or older and lowest for those aged 12–13 years (20.1% vs 15.2%,  $P < 0.05$ ). Among the suicide attempts, adolescents aged 16 years or older were more likely to make suicide attempts with a plan than were adolescents aged 12–13 years (61.2% vs 54.1%,  $P < 0.05$ ).

Table 5 shows the results of multilevel logistic regression analyses of suicide attempts. In the empty model (model 1), the ICC was estimated to be 0.090 at the country level and 0.048 at the school level, indicating that 9.0% and 4.8% of the variance in suicide attempts could be

**Table 4. Prevalence of suicide attempts and proportion of suicide attempt type by gender and age.**

| Characteristics   | Suicide attempt     | Type of suicide attempt     |                                |
|-------------------|---------------------|-----------------------------|--------------------------------|
|                   |                     | Suicide attempt with a plan | Suicide attempt without a plan |
| Gender            |                     |                             |                                |
| Boys              | 16.2% (13.7–18.7)   | 53.2% (49.9–56.5)           | 46.8% (43.5–50.1)              |
| Girls             | 18.2% (15.5–20.9) * | 62.7% (60.1–65.2)*          | 37.3% (34.8–39.9) *            |
| Age               |                     |                             |                                |
| 12–13 years       | 15.2% (13.0–17.4)   | 54.1%(50.7–57.5)            | 45.9%(42.5–49.3)               |
| 14–15 years       | 17.5% (14.9–20.1) ^ | 59.7%(57.5–61.9)^           | 40.3%(38.1–42.5) ^             |
| 16 years or older | 20.1% (17.1–23.1) ^ | 61.2%(58.3–64.1)^           | 38.8%(35.9–41.7) ^             |

\*  $P < 0.05$  for the difference between genders.

^  $P < 0.05$  for the difference between adolescents aged 12–13 years and the other age group.

<https://doi.org/10.1371/journal.pone.0207823.t004>

**Table 5. Multilevel logistic regression analyses of the factors associated with suicide attempts.**

| Variables                                  | Model 1          |        | Model 2*         |                 |        |
|--------------------------------------------|------------------|--------|------------------|-----------------|--------|
|                                            | Coefficient (SE) | P      | Coefficient (SE) | OR (95% CI)     | P      |
| Fixed effect                               |                  |        |                  |                 |        |
| GDP per capita                             |                  |        | -0.019(0.0015)   | 0.98(0.95–1.01) | 0.209  |
| Lack of food (Most of the time/Always)     |                  |        | 0.285(0.0401)    | 1.33(1.23–1.44) | <0.001 |
| Being bullied (Yes)                        |                  |        | 0.774(0.023)     | 2.17(2.07–2.27) | <0.001 |
| Loneliness (Most of the time/Always)       |                  |        | 0.736(0.0292)    | 2.09(1.97–2.21) | <0.001 |
| Anxiety (Most of the time/Always)          |                  |        | 0.740(0.0313)    | 2.10(1.97–2.23) | <0.001 |
| Parental support (Most of the time/Always) |                  |        | -0.326(0.0237)   | 0.72(0.69–0.76) | <0.001 |
| Close friends (Yes)                        |                  |        | -0.501(0.0394)   | 0.61(0.56–0.65) | <0.001 |
| Cigarette smoking (Yes)                    |                  |        | 0.758(0.0288)    | 2.13(2.02–2.26) | <0.001 |
| Alcohol use (Yes)                          |                  |        | 0.506(0.0266)    | 1.66(1.57–1.75) | <0.001 |
| Random effect                              |                  |        |                  |                 |        |
| Level 3: Country                           | 0.343(0.082)     | <0.001 | 0.333(0.122)     |                 | 0.006  |
| Level 2: School                            | 0.185(0.013)     | <0.001 | 0.148(0.016)     |                 | <0.001 |

\*Model 2 was adjusted for age, gender, school, country and survey year

<https://doi.org/10.1371/journal.pone.0207823.t005>

attributed to country and school level, respectively. Model 2 indicated that lack of food (*OR* = 1.33, 95%*CI*: 1.23–1.44), being bullied (*OR* = 2.17, 95%*CI*: 2.07–2.27), loneliness (*OR* = 2.09, 95%*CI*: 1.97–2.21), anxiety (*OR* = 2.10, 95%*CI*: 1.97–2.23), cigarette smoking (*OR* = 2.13, 95%*CI*: 2.02–2.26) and alcohol use (*OR* = 1.66, 95%*CI*: 1.57–1.75) remained risk factors for suicide attempts after adjusting for other factors. Having close friends (*OR* = 0.61, 95%*CI*: 0.56–0.65) and parental support (*OR* = 0.72, 95%*CI*: 0.69–0.76) were significant protective factors for suicide attempts. There was no association between the prevalence of suicide attempts and the country’s per capita GDP (*P*>0.05).

## Discussion

Although the prevalence of suicide attempts varied between countries, suicide attempts are a common problem in LMICs among adolescents aged 12–18 years. In the present study, the 12-month prevalence of suicide attempts was 17.4% among adolescents, which is higher than the prevalence reported in most studies of developed countries, including a study across 17 European countries (10.5%)[12], the 2013 Youth Risk Behavior Survey of students in the United States (8.0%)[13] and a review of 128 studies from mostly developed countries (9.7%) [27]. Compared with the prevalence of suicide attempts among adults in developing countries based on the WHO World Mental Health Surveys[28], the prevalence of suicide attempts among adolescents in our study was much higher (0.3% vs 17.4%, respectively). These data indicate that suicide attempts among adolescents is an issue of major concern in LMICs.

The Western Pacific region exhibited the highest overall prevalence of suicide attempts. The three countries with the highest prevalence rates were Western Pacific countries, i.e., Samoa (61.2%), Solomon (33.6%) and Kiribati (31.5%). Several studies have demonstrated a significant increase in suicidal behavior in Pacific Island countries, especially among youths [29,30]. The reasons for this high prevalence may be explained by societal transitions from traditional to modern resulting in intergenerational conflict, the rise of the nuclear family, direct and indirect suicide contagion, and the co-occurrence of mental disorders[31,32]. The prevalence of suicide attempts in the African region was also considerable (20.6%), particularly for Benin (28.2%), Ghana (26.4%), and Namibia (25.6%), which followed the highest three



Western Pacific countries. This may be partly attributed to food insecurities, political instability and the high prevalence of AIDS[33,34]. The high levels of suicide attempts in these regions and countries point to the need for increased attention in both research and policy.

Gender differences in suicide attempts were not consistent across different regions, especially in the Western Pacific region, where boys showed a higher prevalence of suicide attempts than did girls, contrary to the conclusions of most studies in developed countries. The prevalence of suicide attempts was higher for girls than boys in the Americas and Asia; however the prevalence of the girl-to-boy ratio in most of the countries was lower than that of high-income countries, which is approximately 2:1 or 3:1[12,13,35,36]. These findings implied that gender contributes less to suicide attempts in LMICs than in developed countries. When comparing the type of suicide attempt between genders, we found that the proportion of suicide attempts with a plan was greater for girls than for boys. This might be partly explained by higher levels of depression and lower levels of assertiveness in girls, which are associated with planned suicide attempts[37,38]. It is noteworthy that more than half of the suicide attempts were a planned suicide attempt. Several studies have documented that people who plan suicide attempts tend to choose more lethal suicide methods and, thus, have a higher risk of more severe medical consequences than those who implement impulsive suicide attempts without a plan[39,40]. Given that a suicide plan is developed prior to the actual suicidal behavior, this suggests the importance of identifying a suicide plan early.

In our study, older adolescents were more likely to report suicide attempts than were younger adolescents. This was consistent with the findings of Cui et al[41], yet inconsistent with several studies that reported that the likelihood of suicide attempts decreased in an inverse proportion to age among adolescents[15,42]. The differences in suicide attempts across age groups may be the result of interactions between sociocultural, psychological, developmental and family environmental factors[43]. The present study found that the proportion of suicide attempts without a plan was higher for younger adolescents than for older adolescents, which might indicate that impulsive suicide attempts were more prevalent in younger adolescents. Reasons for this finding may be that younger adolescents who engage in suicide attempts are more ambivalent about willing to die at the time of the act and that some suicidal behaviors are impulsive responses to acute psychosocial stressors[2]. Restricting access to the means of suicide is crucial for suicide prevention, particularly in the cases of impulsive suicide attempts, because this restriction provides an opportunity for these individuals to think clearly about what they are about to do, and this may help them give up suicidal behavior[2]. However, means-restriction policies require an understanding of the method preferences of different groups. Unfortunately, data on the methods used in suicide attempts among adolescents are quite limited. Hence, further studies on suicide attempts addressing suicide methods should be conducted.

The results of the multilevel logistic regression models indicated that a significant amount of the variation in suicide attempts can be attributed to differences between countries and schools. Schools represent an important social context for adolescents. It has been suggested that suicidal behaviors may cluster within schools as a result of interpersonal interactions with peers who are suicidal[44]. The contextual effect of a country's aggregate level on suicide attempts is notable, although we found no association between the prevalence of suicide attempts and the country's per capita GDP. This indirectly suggests that the prevalence of suicide attempts among adolescents depends on multiple non-economic factors, such as ethical values, religious beliefs, media reports and mental health education. The concept of influence of these factors needs to be taken seriously in suicide prevention measures.

The present study demonstrated similar determinants of adolescent suicide attempts as the established risk factors from developed countries and individual LMICs, including poor



socioeconomic status[12], bullying[45,46], mental problems[47,48], substance use[15,49], and weak family and social relationships[50]. Although considerable researches have highlighted the characteristics of adolescent suicide attempts, our understanding of many aspects of suicide attempts in adolescents remains fragmented. We should focus more on the functions of suicide attempts. For example, it is essential to make a distinction between factors associated with thoughts of suicide (e.g., stressful life events appraised as being humiliating or defeating) and those that increase the likelihood of translating such thoughts into actual suicidal behavior (e.g., low levels of social support) [51].

Based on the universal risk factors of adolescent suicide attempts, screening programs were implemented to identify adolescents at high risk of suicide attempts in school settings. Some evidence exists that school-based suicide prevention interventions can effectively reduce suicide attempts among adolescents in rich countries[52,53], however little is known about the effective interventions to reduce adolescent suicidal behaviors in low- and middle-income countries. More research regarding intervention strategies for suicide attempts should be conducted in LMICs.

The strength of our study is that we included a large sample size of GSHS data from 40 LMICs. Moreover, the GSHS relies on standardized sample selection procedures and standard measures of suicidal behaviors and risk factors, which make the results comparable between countries. However, our findings should be viewed with caution given the study limitations. First, the suicide attempts were self-reported, which might not reflect the true prevalence. Although studies have suggested the acceptable reliability and validity of self-reported suicidal behaviors among adolescents in rich countries[54,55], the measures do not appear to have been tested in LMICs. Second, data were collected over several years between 2009 and 2013, and the comparisons of prevalence between different countries should be made cautiously. Finally, the GSHS is limited to youth attending school, however according to the UNESCO Institute for Statistics, the rates of out-of-school among LMICs are very high. Especially, among low-income countries, the lower secondary out-of-school is 38%, and the upper secondary out-of-school rate is 59%[56]. This implies that further study is needed among the out-of-school adolescents in LMICs.

In conclusion, we found that suicide attempts remain a major public health issue among young adolescents in LMICs. We also indicate that girls and older adolescents tend to make suicide attempts with a plan. Although our study has substantiated some universal risk factors of adolescent suicide attempts, further research is needed to understand the functions of suicide attempts as well as the intervention strategies to reduce the burden of suicidal behavior effectively.

## Supporting information

**S1 Table. Prevalence of suicide attempts in young adolescents by gender and country.**  
(PDF)

**S2 Table. Prevalence of suicide attempts in young adolescents by age group.**  
(PDF)

## Acknowledgments

We thank the World Health Organization and the US Centers for Disease Control for making the datasets of the GSHS from all participating countries available on their website. We also thank the survey coordinators from each country for sharing data.

## Author Contributions

**Data curation:** Xiang Liu.

**Formal analysis:** Xiang Liu.

**Funding acquisition:** Yi Huang.

**Supervision:** Yuanyuan Liu.

**Writing – original draft:** Xiang Liu, Yuanyuan Liu.

**Writing – review & editing:** Yi Huang, Yuanyuan Liu.

## References

1. Fleischmann A, De Leo D (2014) The World Health Organization's report on suicide: a fundamental step in worldwide suicide prevention. *Crisis* 35: 289–291. <https://doi.org/10.1027/0227-5910/a000293> PMID: [25297514](https://pubmed.ncbi.nlm.nih.gov/25297514/)
2. WHO (2014) Preventing suicide: A global imperative. Geneva: World Health Organization.
3. WHO (2014) Health for the world's adolescents. Geneva: World Health Organization.
4. McIntosh JL, CW D (2014) U.S.A. SUICIDE: 2011 OFFICIAL FINAL DATA. Washington, DC: American Association of Suicidology.
5. Bostwick JM, Pabbati C, Geske JR, McKean AJ (2016) Suicide Attempt as a Risk Factor for Completed Suicide: Even More Lethal Than We Knew. *Am J Psychiatry* 173: 1094–1100. <https://doi.org/10.1176/appi.ajp.2016.15070854> PMID: [27523496](https://pubmed.ncbi.nlm.nih.gov/27523496/)
6. Hawton K, Bergen H, Cooper J, Turnbull P, Waters K, Ness J, et al. (2015) Suicide following self-harm: findings from the Multicentre Study of self-harm in England, 2000–2012. *J Affect Disord* 175: 147–151. <https://doi.org/10.1016/j.jad.2014.12.062> PMID: [25617686](https://pubmed.ncbi.nlm.nih.gov/25617686/)
7. Beautrais AL (2003) Subsequent mortality in medically serious suicide attempts: a 5 year follow-up. *Aust N Z J Psychiatry* 37: 595–599. <https://doi.org/10.1046/j.1440-1614.2003.01236.x> PMID: [14511088](https://pubmed.ncbi.nlm.nih.gov/14511088/)
8. Hawton K, Arensman E, Wasserman D, Hulten A, Bille-Brahe U, Bjerke T, et al. (1998) Relation between attempted suicide and suicide rates among young people in Europe. *J Epidemiol Community Health* 52: 191–194. PMID: [9616425](https://pubmed.ncbi.nlm.nih.gov/9616425/)
9. Fergusson DM, Horwood LJ, Ridder EM, Beautrais AL (2005) Suicidal behaviour in adolescence and subsequent mental health outcomes in young adulthood. *Psychol Med* 35: 983–993. PMID: [16045065](https://pubmed.ncbi.nlm.nih.gov/16045065/)
10. Goldman-Mellor SJ, Caspi A, Harrington H, Hogan S, Nada-Raja S, Poulton R, et al. (2014) Suicide attempt in young people: a signal for long-term health care and social needs. *JAMA Psychiatry* 71: 119–127. <https://doi.org/10.1001/jamapsychiatry.2013.2803> PMID: [24306041](https://pubmed.ncbi.nlm.nih.gov/24306041/)
11. Kerr DC, Capaldi DM (2011) Young men's intimate partner violence and relationship functioning: long-term outcomes associated with suicide attempt and aggression in adolescence. *Psychol Med* 41: 759–769. <https://doi.org/10.1017/S0033291710001182> PMID: [20540815](https://pubmed.ncbi.nlm.nih.gov/20540815/)
12. Kokkevi A, Rotsika V, Arapaki A, Richardson C (2012) Adolescents' self-reported suicide attempts, self-harm thoughts and their correlates across 17 European countries. *J Child Psychol Psychiatry* 53: 381–389. <https://doi.org/10.1111/j.1469-7610.2011.02457.x> PMID: [21895649](https://pubmed.ncbi.nlm.nih.gov/21895649/)
13. Kann L, Kinchen S, Shanklin SL, Flint KH, Kawkins J, Harris WA, et al. (2014) Youth risk behavior surveillance—United States, 2013. *MMWR Suppl* 63: 1–168.
14. Liang S, Yan J, Zhang T, Zhu C, Situ M, Du N, et al. (2014) Differences between non-suicidal self injury and suicide attempt in Chinese adolescents. *Asian J Psychiatr* 8: 76–83. <https://doi.org/10.1016/j.ajp.2013.11.015> PMID: [24655633](https://pubmed.ncbi.nlm.nih.gov/24655633/)
15. Valdez-Santiago R, Solorzano EH, Iniguez MM, Burgos LA, Gomez Hernandez H, Martinez Gonzalez A, et al. (2017) Attempted suicide among adolescents in Mexico: prevalence and associated factors at the national level. *Inj Prev*.
16. Oppong Asante K, Kugbey N, Osafo J, Quarshie EN-B, Sarfo JO (2017) The prevalence and correlates of suicidal behaviours (ideation, plan and attempt) among adolescents in senior high schools in Ghana. *SSM—Population Health* 3: 427–434. <https://doi.org/10.1016/j.ssmph.2017.05.005> PMID: [29349236](https://pubmed.ncbi.nlm.nih.gov/29349236/)
17. WHO Global School-based Student Health Survey (GSHS) [Internet]. Atlanta: Centers for Disease Control and Prevention; 2016. Available from: <http://www.cdc.gov/GSHS/>.

18. Sharma B, Nam EW, Kim HY, Kim JK (2015) Factors Associated with Suicidal Ideation and Suicide Attempt among School-Going Urban Adolescents in Peru. *Int J Environ Res Public Health* 12: 14842–14856. <https://doi.org/10.3390/ijerph121114842> PMID: 26610536
19. Randall JR, Doku D, Wilson ML, Peltzer K (2014) Suicidal behaviour and related risk factors among school-aged youth in the Republic of Benin. *PLoS One* 9: e88233. <https://doi.org/10.1371/journal.pone.0088233> PMID: 24505443
20. Sharma B, Lee TH, Nam EW (2017) Loneliness, Insomnia and Suicidal Behavior among School-Going Adolescents in Western Pacific Island Countries: Role of Violence and Injury. *Int J Environ Res Public Health* 14.
21. Page RM, Saumweber J, Hall PC, Crookston BT, West JH (2013) Multi-country, cross-national comparison of youth suicide ideation: Findings from Global School-based Health Surveys. *School Psychology International* 34: 540–555.
22. McKinnon B, Garipey G, Sentenac M, Elgar FJ (2016) Adolescent suicidal behaviours in 32 low- and middle-income countries. *Bull World Health Organ* 94: 340–350F. <https://doi.org/10.2471/BLT.15.163295> PMID: 27147764
23. WHO Global School-Based Student Health Survey (GSHS) purpose and methodology. [www.who.int/chp/gshs/methodology/en/index.html](http://www.who.int/chp/gshs/methodology/en/index.html) (accessed Nov 10, 2017).
24. Wang Y, Zhu X, Yi J, Yao S, Cai L (2012) Self-harm and Suicide Behaviors in Middle School Students. *Chinese Journal of Clinical Psychology* 20: 666–667.
25. Brener ND, Kann L, McManus T, Kinchen SA, Sundberg EC, Ross JG (2002) Reliability of the 1999 youth risk behavior survey questionnaire. *J Adolesc Health* 31: 336–342. PMID: 12359379
26. Hox J (2010) *Multilevel analysis. Techniques and Applications*. New York: Routledge.
27. Evans E, Hawton K, Rodham K, Deeks J (2005) The prevalence of suicidal phenomena in adolescents: a systematic review of population-based studies. *Suicide Life Threat Behav* 35: 239–250. PMID: 16156486
28. Borges G, Nock MK, Haro Abad JM, Hwang I, Sampson NA, Alonso J, et al. (2010) Twelve-month prevalence of and risk factors for suicide attempts in the World Health Organization World Mental Health Surveys. *J Clin Psychiatry* 71: 1617–1628. <https://doi.org/10.4088/JCP.08m04967blu> PMID: 20816034
29. De Leo D, Milner A Fau, Xiangdong W (2009) Suicidal behavior in the Western Pacific region: characteristics and trends. *Suicide Life Threat Behav* 39:72–81 <https://doi.org/10.1521/suli.2009.39.1.72> PMID: 19298152
30. Else IR, Andrade Nn Fau, Nahulu LB (2007) Suicide and suicidal-related behaviors among indigenous Pacific Islanders in the United States. *Death Stud* 31:479–501. <https://doi.org/10.1080/07481180701244595> PMID: 17554840
31. Booth H (2010) The Evolution of Epidemic Suicide on Guam: Context and Contagion. *Suicide & life-threatening behavior* 40: 1–13.
32. Booth H (1999) Pacific Island suicide in comparative perspective. *Journal of Biosocial Science* 31: 433. PMID: 10581875
33. Cluver L, Orkin M, Boyes ME, Sherr L (2015) Child and Adolescent Suicide Attempts, Suicidal Behavior, and Adverse Childhood Experiences in South Africa: A Prospective Study. *Journal of Adolescent Health* 57: 52–59. <https://doi.org/10.1016/j.jadohealth.2015.03.001> PMID: 25936843
34. Swahn MH, Palmier JB, Rogers K, Huang Y (2012) Correlates of Suicide Ideation and Attempt among Youth Living in the Slums of Kampala. *International Journal of Environmental Research & Public Health* 9: 596–609. <https://doi.org/10.3390/ijerph14020156>
35. Dieserud G, Gerhardsen Rm, Van den Weghe H Fau—Corbett K, Corbett K Adolescent suicide attempts in Baerum, Norway, 1984–2006.
36. Kokkevi A, Rotsika V, Arapaki A, Richardson C (2011) Increasing self-reported suicide attempts by adolescents in Greece between 1984 and 2007. *Social Psychiatry & Psychiatric Epidemiology* 46: 231–237.
37. Eskin M, Ertekin K (2007) Risk factors for and protective factors against adolescent suicidal behavior in Turkey. *Crisis* 28: 131–139. <https://doi.org/10.1027/0227-5910.28.3.131> PMID: 17992826
38. Brown LK, Overholser J, Spirito A, Fritz GK (1991) The correlates of planning in adolescent suicide attempts. *Journal of the American Academy of Child & Adolescent Psychiatry* 30: 95–99.
39. Hamdi E, Amin Y, Mattar T (1991) Clinical correlates of intent in attempted suicide. *Acta Psychiatrica Scandinavica* 83: 406–411. PMID: 1853736
40. Bacagarcía E, Diazsastre C, Basurte E, Prieto R, Ceverino A, Saiz-Ruiz J, et al. (2001) A prospective study of the paradoxical relationship between impulsivity and lethality of suicide attempts. *Journal of Clinical Psychiatry* 62: 560. PMID: 11488369

41. Cui S, Cheng Y, Xu Z, Chen D, Wang Y (2011) Peer relationships and suicide ideation and attempts among Chinese adolescents. *Child Care Health Dev* 37: 692–702. <https://doi.org/10.1111/j.1365-2214.2010.01181.x> PMID: 21198776
42. Taliaferro LA, Muehlenkamp JJ, Borowsky IW, McMorris BJ, Kugler KC (2012) Factors distinguishing youth who report self-injurious behavior: a population-based sample. *Academic Pediatrics* 12: 205–213. <https://doi.org/10.1016/j.acap.2012.01.008> PMID: 22424698
43. Liang S, Yan J, Zhang T, Zhu C, Situ M, Du N, et al. (2014) Differences between non-suicidal self injury and suicide attempt in Chinese adolescents. *Asian Journal of Psychiatry* 8: 76. <https://doi.org/10.1016/j.ajp.2013.11.015> PMID: 24655633
44. Bernburg JG, Thorlindsson T, Sigfusdottir ID (2009) The spreading of suicidal behavior: The contextual effect of community household poverty on adolescent suicidal behavior and the mediating role of suicide suggestion. *Social Science & Medicine* 68: 380.
45. Kaminski JW, Fang X (2009) Victimization by peers and adolescent suicide in three US samples. *J Pediatr* 155: 683–688. <https://doi.org/10.1016/j.jpeds.2009.04.061> PMID: 19616788
46. Brunstein Klomek A, Marrocco F, Kleinman M, Schonfeld IS, Gould MS (2007) Bullying, depression, and suicidality in adolescents. *J Am Acad Child Adolesc Psychiatry* 46: 40–49. <https://doi.org/10.1097/01.chi.0000242237.84925.18> PMID: 17195728
47. Nock MK, Joiner TE Jr., Gordon KH, Lloyd-Richardson E, Prinstein MJ (2006) Non-suicidal self-injury among adolescents: diagnostic correlates and relation to suicide attempts. *Psychiatry Res* 144: 65–72. <https://doi.org/10.1016/j.psychres.2006.05.010> PMID: 16887199
48. Briere FN, Rohde P, Seeley JR, Klein D, Lewinsohn PM (2015) Adolescent suicide attempts and adult adjustment. *Depress Anxiety* 32: 270–276. <https://doi.org/10.1002/da.22296> PMID: 25421360
49. Chin YR, Choi K (2015) Suicide Attempts and Associated Factors in Male and Female Korean Adolescents A Population-Based Cross-Sectional Survey. *Community Ment Health J* 51: 862–866. <https://doi.org/10.1007/s10597-015-9856-6> PMID: 25812547
50. Miller AB, Esposito-Smythers C, Leichtweis RN (2015) Role of social support in adolescent suicidal ideation and suicide attempts. *J Adolesc Health* 56: 286–292. <https://doi.org/10.1016/j.jadohealth.2014.10.265> PMID: 25561384
51. O'Connor RC, Rasmussen S, Hawton K (2012) Distinguishing adolescents who think about self-harm from those who engage in self-harm. *British Journal of Psychiatry the Journal of Mental Science* 200: 330.
52. Gould MS, Marrocco FA, Hoagwood K, Kleinman M, Amakawa L, Altschuler E (2009) Service use by at-risk youths after school-based suicide screening. *J Am Acad Child Adolesc Psychiatry* 48: 1193–1201. <https://doi.org/10.1097/CHI.0b013e3181bef6d5> PMID: 19858758
53. Wasserman D, Hoven CW, Wasserman C, Wall M, Eisenberg R, Hadlaczky G, et al. (2015) School-based suicide prevention programmes: the SEYLE cluster-randomised, controlled trial. *Lancet* 385: 1536–1544. [https://doi.org/10.1016/S0140-6736\(14\)61213-7](https://doi.org/10.1016/S0140-6736(14)61213-7) PMID: 25579833
54. May A, Klonsky ED (2011) Validity of suicidality items from the Youth Risk Behavior Survey in a high school sample. *Assessment* 18: 379–381. <https://doi.org/10.1177/1073191110374285> PMID: 20622196
55. Zullig KJ, Pun S, Patton JM, Ubbes VA (2006) Reliability of the 2005 middle school Youth Risk Behavior Survey. *Journal of Adolescent Health Official Publication of the Society for Adolescent Medicine* 39: 856–860.
56. UNESCO Institute for Statistics (UIS). One in Five Children, Adolescents and Youth is Out of School. UIS Fact Sheet 2018 No. 48. <http://uis.unesco.org/sites/default/files/documents/fs48-one-five-children-adolescents-youth-out-school-2018-en.pdf>.
