# Supplementary material for: Prevalence, distribution, and associated factors of suicide attempts in young adolescents: School-based data from 40 low-income and middle-income countries
Source: PubMed Central journal article supplement (PMC6300318; doi:10.1371/journal.pone.0207823), 2018-12-19
Supplement: pone.0207823.s001.pdf [file pone.0207823.s001.pdf]

S1 Table. Prevalence of suicide attempts in young adolescents by gender and country

| Country                      | Total           | Boys                         | Girls            |
|------------------------------|-----------------|------------------------------|------------------|
| <b>Africa</b>                |                 |                              |                  |
| Benin                        | 28.2(23.6-33.3) | 28.2(23.3-33.8)              | 28.0(23.4-33.2)  |
| Ghana                        | 26.4(22.5-30.8) | 25.5(21.5-30.0)              | 27.4(22.9-32.4)  |
| Malawi                       | 11.1(6.5-18.1)  | 11.4(6.4-19.4)               | 10.7(6.1-18.2)   |
| Mauritania                   | 16.9(11.7-23.8) | 17.2(11.5-24.9)              | 16.6(11.7-22.9)  |
| Namibia                      | 25.6(21.8-29.8) | 27.1(22.8-31.9)              | 24.2(20.5-28.4)  |
| Swaziland                    | 16.2(13.9-18.7) | 16.3(13.5-19.5)              | 16.1(13.8-18.8)  |
| <b>Americas</b>              |                 |                              |                  |
| Antigua and Barbuda          | 12.3(10.3-14.7) | 9.0(6.8-11.9)                | 15.8(12.1-20.2)* |
| Argentina                    | 16.1(14.9-17.3) | 13.8(12.1-15.7)              | 18.2(16.5-20.0)* |
| Bahamas                      | 14.0(11.8-16.5) | 13.2(9.9-17.2)               | 14.7(12.3-17.5)  |
| Belize                       | 13.3(11.3-15.5) | 11.8(9.9-13.9)               | 14.7(11.9-18.0)  |
| Bolivia                      | 20.7(18.4-23.2) | 16.5(13.7-19.7)              | 25.1(22.9-27.4)* |
| British Virgin Islands       | 12.4(10.9-14.1) | 9.9(7.9-12.3)                | 14.8(12.5-17.3)* |
| Costa Rica                   | 8.5(7.5-9.5)    | 6.5(5.5-7.6)                 | 10.5(9.1-12.0)*  |
| Dominica                     | 15.0(12.9-17.4) | 14.1(11.1-17.8)              | 15.9(13.3-18.9)  |
| Guatemala                    | 13.4(12.2-14.6) | 10.4(8.7-12.3)               | 16.7(14.8-18.7)* |
| Honduras                     | 17.2(15.1-19.7) | 11.7(9.6-14.2)               | 22.2(18.8-26.0)* |
| Jamaica                      | 24.1(18.7-30.5) | 25.8(18.6-34.5)              | 22.3(17.3-28.2)  |
| Peru                         | 17.3(15.6-19.0) | 12.5(10.7-14.4)              | 22.1(19.7-24.7)* |
| Saint Kitts and Nevis        | 13.5(13.5-13.5) | 14.3(14.3-14.3)              | 12.6(12.6-12.6)  |
| Salvador                     | 13.1(11.2-15.2) | 9.3(7.0-12.2)                | 17.1(14.4-20.1)* |
| Suriname                     | 9.8(8.4-11.4)   | 6.3(4.7-8.3)                 | 13.3(11.2-15.7)* |
| Trinidad and Tobago          | 13.5(11.9-15.4) | 12.1(9.9-14.6)               | 14.9(12.3-18.0)  |
| Uruguay                      | 10.2(8.8-11.8)  | 8.1(6.6-10.0)                | 11.9(10.4-13.8)* |
| <b>Eastern Mediterranean</b> |                 |                              |                  |
| Iraq                         | 16.1(13.8-18.6) | 14.8(12.4-17.5)              | 17.8(14.0-22.4)  |
| Kuwait                       | 17.3(14.8-20.1) | 16.4(12.7-20.9)              | 18.3(16.7-20.1)  |
| Lebanon                      | 13.6(12.1-15.3) | 13.2(11.1-15.6)              | 14.0(11.2-17.5)  |
| Morocco                      | 13.9(11.8-16.3) | 12.7(10.5-15.2)              | 15.4(12.8-18.4)* |
| Palestine                    | 21.6(20.0-23.2) | 22.5(20.4-24.7)              | 20.6(18.8-22.6)  |
| United Arab Emirates         | 13.9(11.9-16.1) | 14.0(12.1-16.1)              | 13.8(11.1-17.1)  |
| <b>Asia</b>                  |                 |                              |                  |
| Cambodia                     | 6.8(5.9-7.8)    | 5.7(4.4-7.4)                 | 8.0(6.8-9.3)*    |
| Malaysia                     | 6.7(6.2-7.4)    | 6.3(5.6-7.2)                 | 7.2(6.4-8.0)     |
| Mongolia                     | 9.8(8.8-11.0)   | 8.2(7.0-9.6)                 | 11.3(9.9-12.9)*  |
| Philippines                  | 12.8(11.3-14.5) | 11.1(9.1-13.5)               | 14.5(12.6-16.6)* |
| China <sup>#</sup>           | 5.9(5.4-6.4)    | 5.2(4.5-5.8)                 | 6.7(5.9-7.4)*    |
| <b>Western Pacific</b>       |                 |                              |                  |
| Kiribati                     | 31.5(28.4-34.7) | 31.3(27.3-35.6)              | 31.6(28.2-35.2)  |
| Niue                         | 10.0(5.9-16.3)  | 10.5(5.3-19.9)               | 9.1(4.1-19.2)    |
| Samoa                        | 61.2(54.8-67.3) | 67.8(61.1-73.9) <sup>▲</sup> | 55.2(48.2-62.0)  |

|                 |                 |                              |                 |
|-----------------|-----------------|------------------------------|-----------------|
| Solomon Islands | 33.6(26.2-42.0) | 33.2(25.6-41.7)              | 34.2(25.8-43.7) |
| Tuvalu          | 8.2(6.6-10.3)   | 13.4(10.4-17.0) <sup>▲</sup> | 3.5(2.1-5.6)    |
| Vanuatu         | 24.4(19.7-29.9) | 29.3(24.0-35.2) <sup>▲</sup> | 19.3(13.9-26.3) |

---

# Data are from a large sample size study performed in 2010 in China

\*  $P < 0.05$  for the difference between genders (girls > boys)

▲  $P < 0.05$  for the difference between genders (boys > girls)

Data are expressed as prevalence rate (95% *CI*)
