# Supplementary material for: Prevalence, distribution, and associated factors of suicide attempts in young adolescents: School-based data from 40 low-income and middle-income countries
Source: PubMed Central journal article supplement (PMC6300318; doi:10.1371/journal.pone.0207823), 2018-12-19
Supplement: pone.0207823.s002.pdf [file pone.0207823.s002.pdf]

S2 Table. Prevalence of suicide attempts in young adolescents by age group

| Country                      | Total           | 12-13 years     | 14-15 years       | 16 years or older |
|------------------------------|-----------------|-----------------|-------------------|-------------------|
| <b>Africa</b>                |                 |                 |                   |                   |
| Benin                        | 28.2(23.6-33.3) | 29.0(19.6-40.7) | 28.8(23.4-34.8)   | 27.5(23.1-32.5)   |
| Ghana                        | 26.4(22.5-30.8) | 24.0(19.1-29.7) | 27.0(20.9-34.0)   | 26.9(23.0-31.2)   |
| Malawi                       | 11.1(6.5-18.1)  | 10.0(4.9-19.2)  | 11.3(6.5-19.0)    | 26.6(6.6-64.8)    |
| Mauritania                   | 16.9(11.7-23.8) | 15.8(9.3-25.6)  | 17.9(12.4-25.0)   | 16.0(10.2-24.3)   |
| Namibia                      | 25.6(21.8-29.8) | 24.5(18.4-31.7) | 26.7(22.0-32.2)   | 25.2(21.4-29.4)   |
| Swaziland                    | 16.2(13.9-18.7) | 11.5(8.3-15.8)  | 16.3(13.2-19.9)*  | 16.9(14.6-19.4) * |
| <b>Americas</b>              |                 |                 |                   |                   |
| Antigua and Barbuda          | 12.3(10.3-14.7) | 11.7(8.2-16.4)  | 12.5(9.9-15.7)    | 15.8(3.6-48.7)    |
| Argentina                    | 16.1(14.9-17.3) | 14.6(12.2-17.2) | 16.4(14.8-18.1)   | 17.2(15.3-19.2)   |
| Bahamas                      | 14.0(11.8-16.5) | 12.5(10.0-15.5) | 14.9(11.9-18.6)   | 22.0(14.3-32.1) * |
| Belize                       | 13.3(11.3-15.5) | 9.8(7.6-12.5)   | 14.0(11.6-16.8) * | 19.0(13.9-25.5) * |
| Bolivia                      | 20.7(18.4-23.2) | 18.1(14.5-22.5) | 20.8(18.7-23.1)   | 23.3(18.9-28.3) * |
| British Virgin Islands       | 12.4(10.9-14.1) | 10.4(8.1-13.3)  | 13.5(11.1-16.4)   | 13.4(10.4-17.2)   |
| Costa Rica                   | 8.5(7.5-9.5)    | 8.8(7.1-10.9)   | 7.6(6.2-9.2)      | 10.7(8.6-13.3)    |
| Dominica                     | 15.0(12.9-17.4) | 11.7(9.1-14.9)  | 15.7(13.1-18.7) * | 19.4(14.6-25.3) * |
| Guatemala                    | 13.4(12.2-14.6) | 12.9(10.1-16.5) | 13.6(11.6-15.9)   | 13.2(10.7-16.2)   |
| Honduras                     | 17.2(15.1-19.7) | 18.8(16.2-21.7) | 15.7(12.6-19.2)   | 17.8(13.8-22.7)   |
| Jamaica                      | 24.1(18.7-30.5) | 26.5(17.6-37.8) | 21.7(16.1-28.5)   | 27.7(18.8-38.8)   |
| Peru                         | 17.3(15.6-19.0) | 16.2(13.3-19.6) | 17.4(15.2-19.9)   | 18.0(14.2-22.5)   |
| Saint Kitts and Nevis        | 13.5(13.5-13.5) | 13.8(13.8-13.8) | 13.9(13.9-13.9) * | 11.7(11.7-11.7)   |
| Salvador                     | 13.1(11.2-15.2) | 10.4(7.6-14.1)  | 13.0(10.8-15.5)   | 18.7(14.4-23.9) * |
| Suriname                     | 9.8(8.4-11.4)   | 5.9(4.1-8.5)    | 8.4(6.7-10.5) *   | 13.3(10.8-16.4) * |
| Trinidad and Tobago          | 13.5(11.9-15.4) | 9.5(8.3-10.8)   | 16.0(13.3-19.2) * | 17.7(13.5-22.8) * |
| Uruguay                      | 10.2(8.8-11.8)  | 6.0(4.4-8.0)    | 10.4(8.7-12.5) *  | 15.0(12.4-18.1) * |
| <b>Eastern Mediterranean</b> |                 |                 |                   |                   |
| Iraq                         | 16.1(13.8-18.6) | 12.3(9.8-15.5)  | 15.3(12.8-18.3)   | 21.7(16.7-27.7) * |
| Kuwait                       | 17.3(14.8-20.1) | 16.1(13.1-19.6) | 16.4(13.4-19.9)   | 24.0(17.8-31.4) * |
| Lebanon                      | 13.6(12.1-15.3) | 10.8(9.3-12.5)  | 14.6(12.7-16.8) * | 19.1(14.9-24.1) * |
| Morocco                      | 13.9(11.8-16.3) | 11.1(9.4-13.1)  | 14.3(11.7-17.2) * | 19.0(15.5-23.1) * |
| Palestine                    | 21.6(20.0-23.2) | 21.5(18.9-24.3) | 21.2(18.7-23.9)   | 29.3(23.8-35.4) * |
| United Arab Emirates         | 13.9(11.9-16.1) | 12.1(9.4-15.4)  | 12.5(10.1-15.4)   | 25.9(20.7-31.9) * |
| <b>Asia</b>                  |                 |                 |                   |                   |
| Cambodia                     | 6.8(5.9-7.8)    | 4.9(2.7-8.8)    | 8.0(6.5-9.9)      | 6.4(5.4-7.5)      |
| Malaysia                     | 6.7(6.2-7.4)    | 6.6(5.8-7.5)    | 7.2(6.3-8.2)      | 6.3(5.7-7.0)      |
| Mongolia                     | 9.8(8.8-11.0)   | 9.4(8.1-10.9)   | 9.5(8.1-11.1)     | 10.6(8.3-13.3)    |
| Philippines                  | 12.8(11.3-14.5) | 11.1(7.9-15.4)  | 13.3(11.8-14.9)   | 13.7(11.7-15.9)   |
| <b>Western Pacific</b>       |                 |                 |                   |                   |
| Kiribati                     | 31.5(28.4-34.7) | 27.5(22.3-33.3) | 32.2(28.6-35.9)   | 35.6(28.4-43.5)   |
| Niue                         | 10.0(5.9-16.3)  | 10.3(3.9-24.9)  | 12.0(5.0-26.2)    | 8.0(3.3-18.0)     |
| Samoa                        | 61.2(54.8-67.3) | 62.4(54.3-69.9) | 59.9(52.8-66.5)   | 70.9(58.1-81.0)   |

|                 |                 |                 |                   |                   |
|-----------------|-----------------|-----------------|-------------------|-------------------|
| Solomon Islands | 33.6(26.2-42.0) | 24.8(16.5-35.6) | 34.7(26.2-44.3) * | 37.6(28.9-47.2) * |
| Tuvalu          | 8.2(6.6-10.3)   | 10.1(7.4-13.8)  | 8.7(5.9-12.6)     | 4.8(2.7-8.6)*     |
| Vanuatu         | 24.4(19.7-29.9) | 24.8(16.8-34.9) | 22.6(18.2-27.8)   | 28.5(20.5-38.2)   |

\*  $P < 0.05$  for the difference between adolescents aged 12-13 years and the other age group.

Data are expressed as prevalence (95% *CI*)
